# Supplementary material for: Neuromechanics and Energetics of Walking With an Ankle Exoskeleton Using Neuromuscular-Model Based Control: A Parameter Study
Source: Frontiers journal article supplement (doi:10.3389/fbioe.2021.615358), 2021-04-09
Supplement: Data_Sheet_1.zip [file Data_Sheet_1.zip]

## Sheet: raw_data
Parameter Code	Parameter	Units		Data over gait cycles, exo data (recorded separately as two 10s epochs)						Data over gait cycles, total data: includes biomechanical and muscle activity (EMG) data
raw_data.Exo	Recorded exoskeleton data
'R_GRF'	Right ground reaction force for Exo signals	N		raw_data.Exo.(param)						raw_data.Other.(param)
'L_GRF'	Left ground reaction force for Exo signals	N		1		2		3		1		2		3
'R_ExoAng'	Right Exo joint angle	deg		Trial		Subject		Sample #		Trial		Subject		Sample #
'R_ExoMom'	Right Exo joint moment/torque	Nm		1	no exo	1	S01	Varies per subject		1	no exo	1	S01	Varies per subject
'L_ExoAng'	Left Exo joint angle	deg		2	no power	2	S02			2	no power	2	S02
'L_ExoMom'	Left Exo joint moment/torque	Nm		3	gain 0.8 delay 10	3	S03			3	gain 0.8 delay 10	3	S03
'R_Stim'	Right NMM stimulation signal	unitless		4	gain 0.8	4	S04			4	gain 0.8	4	S04
'R_Act'	Right NMM activation signal	unitless		5	gain 1.6	5	S05			5	gain 1.6	5	S05
'R_Fmtu'	Right NMM muscle tendon unit force	N		6	gain 2.0	6	S06			6	gain 2.0	6	S06
'R_Lce'	Right NMM contractile unit length	m		7	delay 20	7	S07			7	delay 20	7	S07
'R_Lmtu'	Right NMM muscle tendon unit length	m		8	delay 30	8	S08			8	delay 30	8	S08
'fs'	Exo sample frequency	Hz		9	delay 40	9	S09			9	delay 40	9	S09
				10	gain 2.0 delay 40					10	gain 2.0 delay 40
raw_data.Other	Recorded biomechanical and muscle activity data
'R_AnkAng'	Right ankle angle	deg
'R_AnkMom'	Right ankle moment	Nm
'R_AnkPow'	Right ankle power	W
'L_AnkAng'	Left ankle angle	deg
'L_AnkMom'	Left ankle moment	Nm
'L_AnkPow'	Left ankle power	W
'R_KneeAng'	Right knee angle	deg
'R_KneeMom'	Right knee moment	Nm
'R_KneePow'	Right knee power	W
'R_HipAng'	Right hip angle	deg
'R_HipMom'	Right hip moment	Nm
'R_HipPow'	Right hip power	W
'R_MG'	Right medial gastrocnemius EMG	V
'R_LG'	Right medial gastrocnemius EMG	V
'R_SOL'	Right medial gastrocnemius EMG	V
'R_TA'	Right medial gastrocnemius EMG	V
'R_GRF'	Right ground reaction force	N
'L_GRF'	Left ground reaction force	N
'fs_biomech'	Biomechanical (ang, mom, pow,GRF) sampling frequency	Hz
'fs_EMG'	EMG sampling frequency	Hz

## Sheet: dnoGC
Parameter Code	Parameter	Units		Data over gait cycles, subject specific mean						Data over gait cycles, subject average mean
dnoGC.SSM.Exo
'Fmtu'	Muscle tendon unit force	N		dnoGC.SSM.(Exo or Other).(param)						dnoGC.SAM.(Exo or Other).(param)
'R_ExoAnkAng'	Right exo ankle joint angle	deg		1		2		3		1		2
'R_ExoAnkMom'	Right exo ankle joint moment/torque	Nm/kg		Trial		Subject		Normalized		Trial		Normalized
'R_ExoAnkPow'	Right exo ankle joint power	J/kg/s		1	no exo	1	S01	1-101		1	no exo	1-101
'L_ExoAnkAng'	Left exo ankle joint angle	deg		2	no power	2	S02			2	no power
'L_ExoAnkMom'	Left exo ankle joint moment/torque	Nm/kg		3	gain 0.8 delay 10	3	S03			3	gain 0.8 delay 10
'L_ExoAnkPow'	Left exo ankle joint power	J/kg/s		4	gain 0.8	4	S04			4	gain 0.8
'Lce'	Length of the contractile unit	cm		5	gain 1.6	5	S05			5	gain 1.6
'Vce'	Contraction velocity of the contractile unit	cm/s		6	gain 2.0	6	S06			6	gain 2.0
'Pce'	Power of the contractile unit	W		7	delay 20	7	S07			7	delay 20
'Lmtu'	Length of the muscle tendon unit	cm		8	delay 30	8	S08			8	delay 30
'Vmtu'	Velocity of the muscle tendon unit	cm/s		9	delay 40	9	S09			9	delay 40
'Pmtu'	Power of the muscle tendon unit	W		10	gain 2.0 delay 40					10	gain 2.0 delay 40
'Stim'	Neural feedback stimulation signal
'Act'	Activation signal
'Lnrm'	Normalized (L0) length of the contractile unit	%
'Vnrm'	Normalized (Vmax) length of the contractile unit	%
'Fnrm'	Normalized (Fmax) length of the contractile unit	%
'Lsee'	Length of the series elastic tendon	cm
'Vsee'	Velocity of the series elastic tendon	cm/s
'Psee'	Power of the series elastic tendon	W
dnoGC.SSM.Other
R_MG_Nrm'	Normalized (NoPwr Peak) right medial gastrocnemius EMG	%
'R_LG_Nrm'	Normalized (NoPwr Peak) right lateral gastrocnemius EMG	%
'R_SOL_Nrm'	Normalized (NoPwr Peak) right soleus EMG	%
'R_TA_Nrm'	Normalized (NoPwr Peak) right tibialis anterior EMG	%
'R_TotAnkMom'	Right total ankle moment	Nm/kg
'R_TotAnkPow'	Right total ankle power	W/kg
'R_BioAnkMom'	Right biological ankle moment	Nm/kg
'R_BioAnkPow'	Right biological ankle power	W/kg
'L_TotAnkMom'	Left total ankle moment	Nm/kg
'L_TotAnkPow'	Left total ankle power	W/kg
'L_BioAnkMom'	Left biological ankle moment	Nm/kg
'L_BioAnkPow'	Left biological ankle power	W/kg
'L_BioAnkAng'	Left biological ankle angle	deg
'R_BioAnkAng'	Right biological ankle angle	deg
'R_BioKneeAng'	Right biological knee angle	deg
'R_BioKneeMom'	Right biological knee moment	Nm/kg
'R_BioKneePow'	Right biological knee power	W/kg
'R_BioHipAng'	Right biological hip angle	deg
'R_BioHipMom'	Right biological hip moment	Nm/kg
'R_BioHipPow'	Right biological hip power	W/kg
'R_MG'	Right medial gastrocnemius EMG	V
'R_LG'	Right lateral gastrocnemius EMG	V
'R_SOL'	Right soleus EMG	V
'R_TA'	Right tibialis anterior EMG	V
dnoGC.SAM.Exo
'R_ExoAnkAng'	'Average right exo ankle joint angle	deg
'R_ExoAnkMom'	'Average right exo ankle joint moment/torque	Nm/kg
'R_ExoAnkPow'	'Average right exo ankle joint power	W/kg
'AvgLce'	Average length of the contractile unit	cm
'AvgVce'	Average contraction velocity of the contractile unit	cm/s
'AvgPce'	Average power of the contractile unit	W
'AvgLmtu'	Average length of the muscle tendon unit	cm
'AvgVmtu'	Average velocity of the muscle tendon unit	cm/s
'AvgPmtu'	Average power of the muscle tendon unit	W
'AvgLsee'	Average length of the series elastic tendon	cm
'AvgVsee'	Average velocity of the series elastic tendon	cm/s
'AvgPsee'	Average power of the series elastic tendon	W
'AvgStim'	Average neural feedback stimulation signal
'AvgAct'	Average activation signal
'AvgLnrm'	Average normalized (L0) length of the contractile unit	cm
'AvgVnrm'	Average normalized (Vmax) length of the contractile unit	cm/s
'AvgFnrm'	Average normalized (Fmax) length of the contractile unit	W
'AvgFmtu'	Average muscle tendon unit force	N
'dLce'	Change in length of the series elastic tendon	cm
'dLsee'	Change in velocity of the series elastic tendon	cm/s
'dLmtu'	Change in power of the series elastic tendon	W
dnoGC.SAM.Other
'R_TotAnkMom'	Right total ankle moment	Nm/kg
'R_TotAnkPow'	Right total ankle power	W/kg
'R_BioAnkMom'	Right biological ankle moment	Nm/kg
'R_BioAnkPow'	Right biological ankle power	W/kg
'BioAnkAng'	Right biological ankle angle	deg
'BioKneeAng'	Right biological knee angle	deg
'BioKneeMom'	Right biological knee moment	Nm/kg
'BioKneePow'	Right biological knee power	W/kg
'BioHipAng'	Right biological hip angle	deg
'BioHipMom'	Right biological hip moment	Nm/kg
'BioHipPow'	Right biological hip power	W/kg
'L_BioAnkMom'	Left biological ankle moment	Nm/kg
'L_BioAnkPow'	Left biological ankle power	W/kg
'L_BioAnkAng'	Left biological ankle angle	deg
'R_MGNrm_series'	Right medial gastrocnemius EMG	V
'R_LGNrm_series'	Right lateral gastrocnemius EMG	V
'R_SOLNrm_series'	Right soleus EMG	V
'R_TANrm_series'	Right tibialis anterior EMG	V
'R_AvgMGNrm'	Normalized (NoPwr Peak) right medial gastrocnemius EMG	%
'R_AvgLGNrm'	Normalized (NoPwr Peak) right lateral gastrocnemius EMG	%
'R_AvgSOLNrm'	Normalized (NoPwr Peak) right soleus EMG	%
'R_AvgTANrm'	Normalized (NoPwr Peak) right tibialis anterior EMG	%

## Sheet: deGC
Parameter Code	Parameter	Units
deGC.SSM.Exo				Data average across gait cycles, subject average means					Data calculated across gait cycles, condition specific means
'Fmtu'	Muscle tendon unit force	N
'R_ExoAnkAng'	Right exo ankle joint angle	deg		deGC.SSM.(Exo or Other).(param)					deGC.SAM.(Exo or Other).(param)
'R_ExoAnkMom'	Right exo ankle joint moment/torque	Nm/kg		1		2			1
'R_ExoAnkPow'	Right exo ankle joint power	J/kg/s		Trial		Subject			Trial
'L_ExoAnkAng'	Left exo ankle joint angle	deg		1	no exo	1	S01		1	no exo
'L_ExoAnkMom'	Left exo ankle joint moment/torque	Nm/kg		2	no power	2	S02		2	no power
'L_ExoAnkPow'	Left exo ankle joint power	J/kg/s		3	gain 0.8 delay 10	3	S03		3	gain 0.8 delay 10
'Lce'	Length of the contractile unit	cm		4	gain 0.8	4	S04		4	gain 0.8
'Vce'	Contraction velocity of the contractile unit	cm/s		5	gain 1.6	5	S05		5	gain 1.6
'Pce'	Power of the contractile unit	W		6	gain 2.0	6	S06		6	gain 2.0
'Lmtu'	Length of the muscle tendon unit	cm		7	delay 20	7	S07		7	delay 20
'Vmtu'	Velocity of the muscle tendon unit	cm/s		8	delay 30	8	S08		8	delay 30
'Pmtu'	Power of the muscle tendon unit	W		9	delay 40	9	S09		9	delay 40
'Stim'	Neural feedback stimulation signal			10	gain 2.0 delay 40				10	gain 2.0 delay 40
'Act'	Activation signal
'Lnrm'	Normalized (L0) length of the contractile unit	%
'Vnrm'	Normalized (Vmax) length of the contractile unit	%
'Fnrm'	Normalized (Fmax) length of the contractile unit	%
'Lsee'	Length of the series elastic tendon	cm
'Vsee'	Velocity of the series elastic tendon	cm/s
'Psee'	Power of the series elastic tendon	W
deGC.SSM.Other
'R_MG_Nrm'	Normalized (NoPwr Peak) right medial gastrocnemius EMG	%
'R_LG_Nrm'	Normalized (NoPwr Peak) right lateral gastrocnemius EMG	%
'R_SOL_Nrm'	Normalized (NoPwr Peak) right soleus EMG	%
'R_TA_Nrm'	Normalized (NoPwr Peak) right tibialis anterior EMG	%
'R_TotAnkMom'	Right total ankle moment	Nm/kg
'R_TotAnkPow'	Right total ankle power	W/kg
'R_BioAnkMom'	Right biological ankle moment	Nm/kg
'R_BioAnkPow'	Right biological ankle power	W/kg
'BioAnkAng'	Left total ankle moment	Nm/kg
'BioKneeAng'	Left total ankle power	W/kg
'BioKneeMom'	Left biological ankle moment	Nm/kg
'BioKneePow'	Left biological ankle power	W/kg
'BioHipAng'	Left biological ankle angle	deg
'BioHipMom'	Right biological ankle angle	deg
'BioHipPow'	Right biological knee angle	deg
'L_TotAnkMom'	Right biological knee moment	Nm/kg
'L_TotAnkPow'	Right biological knee power	W/kg
'L_BioAnkMom'	Right biological hip angle	deg
'L_BioAnkPow'	Right biological hip moment	Nm/kg
'L_BioAnkAng'	Right biological hip power	W/kg
'R_MG'	Right medial gastrocnemius EMG	V
'R_LG'	Right lateral gastrocnemius EMG	V
'R_SOL'	Right soleus EMG	V
'R_TA'	Right tibialis anterior EMG	V
deGC.SAM.Exo
'R_ExoWork'	Right exo ankle work	J/kg
'R_ExoPosWork'	Right exo ankle positive work	J/kg
'R_ExoNegWork'	Right exo ankle negative work	J/kg
'R_AvgExoMom'	Average right exo ankle moment/torque	Nm/kg
'L_ExoWork'	Left exo ankle work	J/kg
'L_ExoPosWork'	Left exo ankle positive work	J/kg
'L_ExoNegWork'	Left exo ankle negative work	J/kg
'L_AvgExoMom'	Average left exo ankle moment/torque	Nm/kg
'Sum_ExoWork'	Summed exo ankle work	J/kg
'Sum_ExoPosWork'	Summed exo ankle positive work	J/kg
'ExoNegWork'	Summed exo ankle negative work	J/kg
'AvgExoMom'	Average summed exo ankle moment/torque	Nm/kg
deGC.SAM.Other
'R_AvgTotMom'	Average right total ankle moment/torque	Nm/kg
'L_TotWork'	Left total ankle work	J/kg
'L_TotPosWork'	Left total ankle positive work	J/kg
'L_TotNegWork'	Left total ankle negative work	J/kg
'L_AvgTotMom'	Average left total ankle moment/torque	Nm/kg
'TotWork'	Summed total ankle work	J/kg
'TotPosWork'	Summed total ankle positive work	J/kg
'TotNegWork'	Summed total ankle negative work	J/kg
'AvgTotMom'	Average summed total ankle moment/torque	Nm/kg
'R_BioWork'	Right biological ankle work	J/kg
'R_BioPosWork'	Right biological ankle positive work	J/kg
'R_BioNegWork'	Right biological ankle negative work	J/kg
'R_AvgBioMom'	Average right biological ankle moment/torque	Nm/kg
'L_BioWork'	Right biological ankle work	J/kg
'L_BioPosWork'	Right biological ankle positive work	J/kg
'L_BioNegWork'	Right biological ankle negative work	J/kg
'L_AvgBioMom'	Average right biological ankle moment/torque	Nm/kg
'BioWork'	Summed biological ankle work	J/kg
'BioPosWork'	Summed biological ankle positive work	J/kg
'BioNegWork'	Summed biological ankle negative work	J/kg
'AvgBioMom'	Average summed biological ankle moment/torque	Nm/kg
'R_AvgMG'	Right medial gastrocnemius EMG	V
'R_AvgLG'	Right lateral gastrocnemius EMG	V
'R_AvgSOL'	Right soleus EMG	V
'R_AvgTA'	Right tibialis anterior EMG	V
'R_RMS_MGNrm'	Normalized (NoPwr Peak) right medial gastrocnemius EMG	%
'R_RMS_LGNrm'	Normalized (NoPwr Peak) right lateral gastrocnemius EMG	%
'R_RMS_SOLNrm'	Normalized (NoPwr Peak) right soleus EMG	%
'R_RMS_TANrm'	Normalized (NoPwr Peak) right tibialis anterior EMG	%

## Sheet: dataMet
Parameter location	Parameter	Units	Data found once every breath, subject specific means
dataMet.nexo	Normalized Metabolic Power for the no exo condition	W/kg
dataMet.npwr	Normalized Metabolic Power for the unpowered exo condition	W/kg	deGC.(Trial)
dataMet.G12D10	Normalized Metabolic Power for the Gain = 1.2 and Delay = 10 ms condition	W/kg	1
dataMet.G08	Normalized Metabolic Power for the Gain = 0.8 condition	W/kg	Subject
dataMet.G16	Normalized Metabolic Power for the Gain =1.6 condition	W/kg	1	S01
dataMet.G20	Normalized Metabolic Power for the Gain = 2.0 condition	W/kg	2	S02
dataMet.D20	Normalized Metabolic Power for the Delay = 20 ms condition	W/kg	3	S03
dataMet.D30	Normalized Metabolic Power for the Delay = 30 ms condition	W/kg	4	S04
dataMet.D40	Normalized Metabolic Power for the Delay = 40 ms condition	W/kg	5	S05
dataMet.G20D40	Normalized Metabolic Power for the Gain = 2.0 and Delay = 40 ms condition	W/kg	6	S06
			7	S07
			8	S08
			9	S09

## Sheet: events
Parameter Code	Parameter	Units
L_HS	Left HS	sample number		Gait events for all subjects and trials
R_HS	Right HS	sample number
				events.(param)
				1		2		3
				Trial		Subject		gait cycles #
				1	no exo	1	S01	Varies per subject
				2	no power	2	S02
				3	gain 0.8 delay 10	3	S03
				4	gain 0.8	4	S04
				5	gain 1.6	5	S05
				6	gain 2.0	6	S06
				7	delay 20	7	S07
				8	delay 30	8	S08
				9	delay 40	9	S09
				10	gain 2.0 delay 40

## Sheet: anthro_data
Parameter Code	Parameter	Units
age	Subject age	years		Anthropomorphic data for each subject
height	Subject height	meters
males	Number of male subjects	count		anthro_data.(param)
females	Number of female subjects	count		1
mass	Subject mass	kg		Subject
				1	S01
				2	S02
				3	S03
				4	S04
				5	S05
				6	S06
				7	S07
				8	S08
				9	S09
